# Supplementary material for: Effects of homocysteine lowering with B vitamins on cognitive aging: meta-analysis of 11 trials with cognitive data on 22,000 individuals1
Source: PubMed Central journal article supplement (PMC4095663; doi:10.3945/ajcn.113.076349), 2014-06-25
Supplement: 113.076349_ajcn076349SupplementaryData1.pdf [file 113.076349_ajcn076349SupplementaryData1.pdf]

# Supplemental Material

**Page 1: Contents list.** (Click on an underlined item to jump to it)

P2: Supplemental Methods. Standard approach to combining individual domain tests and inclusion of published results from the FACIT trial.

P4: Supplemental Table 1. Details of different cognitive tests used in the cognitive-domain trials by domain as defined within the trial.

P6: Supplemental Table 2. Factors used to re-scale individual specific domains, domain-composite and MMSE-type global cognitive function scores.

P7: Supplemental Table 3. Daily doses of B-vitamins in individual trials.

P8: Supplemental Table 4. Median plasma levels of folate and homocysteine before and after study treatment.

P9: Supplemental Table 5. Median plasma levels of vitamin B12 before and after study treatment.

P10: Supplemental Table 6. Effects of B-vitamins on cognitive aging in all available trials (including Ford) after taking account of duration of treatment and percent homocysteine reduction.

P11: Supplemental Figure 1. Screening and selection of included trials.

P12: Supplemental Figure 2. Effects of B-vitamins on the memory and executive function domains of cognitive function assessed using change from baseline.

P13: Supplemental Figure 3. Effects of B-vitamins on the MMSE-type global cognitive function score in cognitive-domain trials assessed using change from baseline.

P14: Supplemental Figure 4. Effects of B-vitamins on MMSE-type global cognitive function score at the end of the treatment period in various subgroups in global cognition trials.

P15: Supplemental Figure 5. Effects of B-vitamins on cognitive aging using MMSE-type global cognitive function score in all available trials after taking account of duration of treatment and percent homocysteine reduction.

## Supplemental Methods

### *Standard approach to combining individual domain tests*

The Z-scores for each separate test were estimated by subtracting the mean and dividing by the standard deviation of the pooled results before and after treatment. The overall scores for the domains of memory, speed and executive were calculated from the average of the component Z-scores as defined within each individual trial. The domain-composite global cognitive function score was calculated from the average of the three domain-specific scores within each trial.<sup>1,2</sup>

### *Inclusion of published results from the FACIT trial*

The FACIT trial declined to contribute individual participant data, but it was possible to estimate most of the required statistics from the tables presented in their comprehensive original publication,<sup>1</sup> and hence the FACIT results are included in the present meta-analysis. Details of the methods used to include the published results of FACIT in the present meta-analysis are provided below:

*i) Domain-specific and domain-composite global cognitive function:* The end-treatment overall SD of the Z-score for each domain and domain-composite (referred to as “global cognitive function” in their paper) was computed from the sums of squares of the active and placebo group SDs at year 3 that were provided in Table 5 (p215) of the published report. This overall SD was used as the scaling factor. Reported score results (differences and SEs) were rescaled by dividing by the scaling factor as the equivalent of the rescaling applied to individual scores in the other studies.

*ii) Homocysteine, Folate and Vitamin B12:* For the FACIT trial the homocysteine (tHcy), folate and vitamin B12 data were abstracted from means, SDs and numbers reported in Table 3 of their published report (p214). The percent tHcy reduction was based on the difference between the percent reductions in the folate and placebo groups (i.e.  $100 * [(H_{3f} - H_{0f})/H_{0f} - (H_{3p} - H_{0p})/H_{0p}]$  where  $H_{0f}$  and  $H_{0p}$  are homocysteine levels at baseline in folic acid and placebo groups, respectively;  $H_{3f}$  and  $H_{3p}$  are homocysteine levels at year 3 in folic acid and placebo groups, respectively.

*iii) Variance of global cognitive function scores in placebo allocated participants with repeat assessments:* . The variance of change in domain-composite global cognitive function in the placebo group was re-scaled as in (i).

*(iv) Age association with domain-composite global cognitive function:* The association of age with domain-composite global cognitive function, was estimated from the reported result that the effect of 3 years of folic acid supplementation, given as 0.05 in Table5, corresponded to a cognitive performance of someone 1.5 years younger (p213). Thus, this yielded the change of FACIT score with age as  $-0.05/1.5=-0.033$  per year and a change in our rescaled score of  $-0.033/0.6975=-0.048$  per year..

All these manipulations are close summary equivalents to the procedures applied to individual participant data.

## References

1. Durga J, van Boxtel MP, Schouten EG *et al.* Effect of 3-year folic acid supplementation on cognitive function in older adults in the FACIT trial: a randomised, double blind, controlled trial. *Lancet* 2007; 369(9557):208-16.
2. Lewerin C, Matousek M, Steen G, Johansson B, Steen B, Nilsson-Ehle H. Significant correlations of plasma homocysteine and serum methylmalonic acid with movement and cognitive performance in elderly subjects but no improvement from short-term vitamin therapy: a placebo-controlled randomized study. *Am J Clin Nutr* 2005; 81(5):1155-62.

**Supplemental Table 1: Details of different cognitive tests used in each cognitive-domain trial by domain as defined within the study**

| <b>Trial</b>   | <b>Name of cognitive test</b>                       | <b>Cognitive domain as defined in study</b> | <b>Brief description of the test</b>                                                                                                                                 |
|----------------|-----------------------------------------------------|---------------------------------------------|----------------------------------------------------------------------------------------------------------------------------------------------------------------------|
| Eussen         | Finger Tapping                                      | Speed                                       | Computerised task, press a single button as often as possible within 30 seconds.                                                                                     |
| Eussen         | Motor Planning_2                                    | Speed                                       | Computerised task, press a lit button out of 3 buttons as often as possible within 30 seconds.                                                                       |
| Eussen         | Motor Planning_3                                    | Executive function                          | Computerised task, press a button immediately adjacent to a lit button                                                                                               |
| Eussen         | Figure of Rey – copy                                | Praxis                                      | Copy the complex figure of Rey from an example                                                                                                                       |
| Eussen         | Figure of Rey - immediate recall                    | Memory                                      | Draw the complex figure of Rey without the example immediately after the copy                                                                                        |
| Eussen         | 15 Word Learning –immediate recall                  | Memory                                      | 15 words are read 5 times and in between the participant recalls the words                                                                                           |
| Eussen         | Retian Trail Making Test Part A                     | Speed                                       | Randomly placed numbers have to be connected with a line as fast as possible                                                                                         |
| Eussen         | Reitan Trail Making Test Part B                     | Executive function                          | Randomly numbers and letters have to be connected with a line as fast as possible                                                                                    |
| Eussen/Lewerin | Digit Span Forward                                  | Attention                                   | Repeat a string of digits in original order                                                                                                                          |
| Eussen/Lewerin | Digit Span Backward                                 | Memory                                      | Repeat a string of digits in reverse order                                                                                                                           |
| Eussen         | Raven Progressive Matrices                          | Executive function                          | Chose a design that fits into a matrix for 24 matrices                                                                                                               |
| Eussen/FACIT   | Stroop 1                                            | Executive function                          | Read names of colours red, green yellow, blue                                                                                                                        |
| Eussen/FACIT   | Stroop 2                                            | Executive function                          | Name coloured bocks red green, yellow, blue                                                                                                                          |
| Eussen/FACIT   | Stroop 3                                            | Executive function                          | Name colour of the ink rather than the word                                                                                                                          |
| Eussen         | Figure of Rey - delayed recall                      | Memory                                      | Draw the complex figure of Rey without the example 30 minutes after the copy                                                                                         |
| Eussen         | 15 Word Learning - delayed recall                   | Memory                                      | Recalls the words of the 15 word learning test the participants remembered                                                                                           |
| Eussen         | 15 Word Learning                                    | Memory                                      | 30 words are read of which the participant has to recognise the original 15 words                                                                                    |
| Eussen         | Similarities Weschler Adult Intelligence Scale      | Executive function                          | Mention similarities between 5 pairs of nouns                                                                                                                        |
| Eussen         | Verbal Fluency, letter                              | Executive function                          | List as many nouns beginning with letter P or G as possible in 2 minutes                                                                                             |
| Eussen/FACIT   | Verbal Fluency, animal                              | Executive function                          | List as many animals as possible in 2 minutes.                                                                                                                       |
| Lewerin        | Identical forms                                     | Speed                                       | Contains 60 items of identification. For each item, a complex figure is compared with 5 other figures, and the one that is identical is marked                       |
| Lewerin        | Visual reproduction                                 | Memory                                      | 4 drawings are shown to the tested subject to be remembered and reproduced                                                                                           |
| Lewerin        | Synonyms                                            | Executive function                          | The subjects have to select from among 5 words a synonym for a given word                                                                                            |
| Lewerin        | Block design                                        | Executive function                          | The test consists of 7 designs that have to be made out of red, white, and red and white blocks. Bonuses are given for rapid performance.                            |
| Lewerin        | Digit symbol                                        | Speed                                       | The subjects are asked to replace digits with symbols according to an existing code with a time limit of 90 seconds.                                                 |
| Lewerin        | Thurstones's Picture Memory Test                    | Memory                                      | Subjects look at 28 pictures consecutively, which are presented at a rate of every 5 seconds; they are later asked to identify the picture among 4 similar pictures. |
| Lewerin        | Figure classification                               | Executive function                          | In each item 5 figures are given the figure that is different from the others should be marked by the subject.                                                       |
| McMahon        | Rey Auditory Verbal Learning Test Trials I - V      | Memory                                      | Consists of five presentations of a 15-word list. Participants are asked to recall as many words as possible on the lists after each presentation.                   |
| McMahon        | Rey Auditory Verbal Learning Test Delayed Trial VII | Memory                                      | Delayed recall may be examined with a seventh recall trial after a 20-30 minute delay.                                                                               |

**Supplemental Table 1: Details of different cognitive tests used in each cognitive-domain trial by domain as defined within the study**

| <b>Trial</b>     | <b>Name of cognitive test</b>                                                 | <b>Cognitive domain as defined in study</b> | <b>Brief description of the test</b>                                                                                                                                                                                                                                                         |
|------------------|-------------------------------------------------------------------------------|---------------------------------------------|----------------------------------------------------------------------------------------------------------------------------------------------------------------------------------------------------------------------------------------------------------------------------------------------|
| McMahon          | Weschler Paragraph Recall tests                                               | Memory                                      | Asked to recall the main details after hearing a short story (paragraph) either immediately or after about an hour without warning.                                                                                                                                                          |
| McMahon          | Controlled Oral Word Association Test of the Multilingual Aphasia Examination | Executive function                          | Requires participants to generate as many words as possible with a specified initial letter in 60 seconds                                                                                                                                                                                    |
| McMahon          | Category Word Fluency Test                                                    | Executive function                          | Total number of words generated in a specific category in 60 seconds. For example subjects asked to generate words from three specified categories (animals, fruit and vegetables and means of transportation)                                                                               |
| McMahon<br>FACIT | Reitan Trail Making Test Part B<br>Word Learning Test                         | Speed<br>Memory                             | Randomly numbers and letters have to be connected with a line as fast as possible<br>Participants asked to memorise 15 commonly used monosyllabic words presented in a fixed sequence of 2 seconds. Immediately after the 15 words are presented the subjects are asked to recall the words. |
| FACIT            | Concept shifting tests                                                        | Executive function                          | A timed tests with 4 subtests that measure switching between two psychological concepts                                                                                                                                                                                                      |
| FACIT            | Letter Digit Substitution Test                                                | Speed                                       | Nine different letters are assigned a unique number (1-9) the participants are presented with a random series of letters and asked to add the corresponding digit to the letters in 90 seconds.                                                                                              |

**Supplemental Table 2: Factors used to re-scale individual specific domains, domain-composite and MMSE-type global cognitive function scores**

| <b>End-treatment SD values used to re-scale domain-specific and global cognitive scores</b> |                                                         |               |                               |              |                                                  |  |
|---------------------------------------------------------------------------------------------|---------------------------------------------------------|---------------|-------------------------------|--------------|--------------------------------------------------|--|
| <b>Trial (Reference)</b>                                                                    | <b>Domain-composite<br/>global cognitive<br/>scores</b> | <b>Memory</b> | <b>Executive<br/>function</b> | <b>Speed</b> | <b>MMSE-type<br/>global cognitive<br/>scores</b> |  |
| <b><i>Cognitive-domain trials</i></b>                                                       |                                                         |               |                               |              |                                                  |  |
| Eussen (7)                                                                                  | 0.392                                                   | 0.653         | 0.502                         | 0.736        | 0.950                                            |  |
| Lewerin (8)                                                                                 | 0.680                                                   | 0.704         | 0.777                         | 0.865        |                                                  |  |
| McMahon (9)                                                                                 | 0.605                                                   | 0.736         | 0.712                         | 0.899        | 0.960                                            |  |
| FACIT (10) <sup>1</sup>                                                                     | 0.698                                                   | 0.963         | 0.991                         | 0.880        |                                                  |  |
| <b><i>Global cognition trials</i></b>                                                       |                                                         |               |                               |              |                                                  |  |
| Stott (11)                                                                                  |                                                         |               |                               |              | 0.985                                            |  |
| HOPE-2 (12)                                                                                 |                                                         |               |                               |              | 0.982                                            |  |
| SU.FOL.OM3 (13)                                                                             |                                                         |               |                               |              | 0.953                                            |  |
| WAFACS (14)                                                                                 |                                                         |               |                               |              | 0.976                                            |  |
| VISP (15)                                                                                   |                                                         |               |                               |              | 0.983                                            |  |
| VITATOPS (16)                                                                               |                                                         |               |                               |              | 0.983                                            |  |
| SEARCH (17)                                                                                 |                                                         |               |                               |              | 0.949                                            |  |

<sup>1</sup> Published data only.

### Supplemental Table 3: Daily doses of B-Vitamins in individual trials

| Trial (Reference)                     | Number with cognitive function measured at baseline | Number (%) with cognitive function at end treatment | Inclusion criteria |              |                            | Country                   | Daily dose of B-vitamins (mg) |             |            |
|---------------------------------------|-----------------------------------------------------|-----------------------------------------------------|--------------------|--------------|----------------------------|---------------------------|-------------------------------|-------------|------------|
|                                       |                                                     |                                                     | Age range (years)  | B12 (pmol/L) | Prior disease <sup>1</sup> |                           | Folic acid                    | Vitamin B12 | Vitamin B6 |
| <b><i>Cognitive-domain trials</i></b> |                                                     |                                                     |                    |              |                            |                           |                               |             |            |
| Eussen (7) <sup>2</sup>               | 130                                                 | 108 (83)                                            | 70+                | 100 -300     | Nil                        | Netherlands               | 0.4                           | 0.99        | -          |
| Lewerin (8)                           | 202                                                 | 183 (91)                                            | N/A                | N/A          | Nil                        | Sweden                    | 0.8                           | 0.50        | 3          |
| McMahon (9)                           | 273                                                 | 248 (91)                                            | 65+                | N/A          | Nil                        | New Zealand               | 1.0                           | 0.50        | 10         |
| FACIT (10) <sup>3</sup>               | 818                                                 | 801 (98)                                            | 50 -70             | 200+         | Nil                        | Netherlands               | 0.8                           | -           | -          |
| <b>Sub-total</b>                      | <b>1423</b>                                         | <b>1340 (94)</b>                                    |                    |              |                            |                           |                               |             |            |
| <b><i>Global cognition trials</i></b> |                                                     |                                                     |                    |              |                            |                           |                               |             |            |
| Stott (11) <sup>2</sup>               | 185                                                 | 167 (90)                                            | 65+                | 185+         | Stroke <sup>4</sup>        | UK                        | 2.5                           | 0.40        | 25         |
| HOPE-2 (12)                           | 1327                                                | 1245 (94)                                           | 55+                | N/A          | CVD                        | Canada/Europe             | 2.5                           | 1.00        | 50         |
| SU.FOL.OM3 (13) <sup>2</sup>          | -                                                   | 1309 (-)                                            | 45 -80             | N/A          | CHD                        | France                    | 0.6                           | 0.02        | 3          |
| WAFACS (14)                           | 2007                                                | 1756 (87)                                           | 65+                | N/A          | CVD                        | USA                       | 2.5                           | 1.00        | 50         |
| VISP (15)                             | 3680                                                | 2653 (72)                                           | 35+                | N/A          | Stroke                     | USA/UK <sup>5</sup>       | 2.5                           | 0.40        | 25         |
| VITATOPS (16)                         | -                                                   | 4410 (-)                                            | 45 -80             | N/A          | Stroke                     | 20 countries <sup>6</sup> | 2.0                           | 0.50        | 25         |
| SEARCH (17)                           | -                                                   | 8891 (-)                                            | 18 -80             | N/A          | CHD                        | UK                        | 2.0                           | 1.00        | -          |
| <b>Sub-total</b>                      | <b>7199</b>                                         | <b>20431 (-)</b>                                    |                    |              |                            |                           |                               |             |            |

<sup>1</sup> CVD: Prior cardiovascular disease or increased risk of cardiovascular disease; CHD: Coronary Heart Disease.

<sup>2</sup> Refers to group allocated B-vitamins vs placebo.

<sup>3</sup> Published data only.

<sup>4</sup> About 60% of participants had a prior history of stroke.

<sup>5</sup> 3634 from United States, 46 from United Kingdom.

<sup>6</sup> Australia, Austria, Belgium, Brazil, Hong Kong, India, Italy, Malaysia, Moldova, Netherlands, New Zealand, Pakistan, Philippines, Portugal, Republic of Georgia, Serbia & Monte Negro, Singapore, Sri Lanka, UK, USA.

**Supplemental Table 4: Median plasma levels of folate and homocysteine before and after study treatment**

| Trial (Reference)                     | Number with cognitive function measured at baseline | Number (%) with cognitive function at end treatment | Folate (nmol/L)  |                  |                  |                  | Homocysteine (µmol/L) |                   |                    |                    |
|---------------------------------------|-----------------------------------------------------|-----------------------------------------------------|------------------|------------------|------------------|------------------|-----------------------|-------------------|--------------------|--------------------|
|                                       |                                                     |                                                     | B-vitamins       |                  | Placebo          |                  | B-vitamins            |                   | Placebo            |                    |
|                                       |                                                     |                                                     | Before (N)       | After(N)         | Before(N)        | After(N)         | Before(N)             | After(N)          | Before(N)          | After(N)           |
| <b><i>Cognitive-domain trials</i></b> |                                                     |                                                     |                  |                  |                  |                  |                       |                   |                    |                    |
| Eussen (7) <sup>1,2</sup>             | 130                                                 | 108 (83)                                            | -                | -                | -                | -                | 14.4 (63)             | 9.0 (51)          | 15.0 (63)          | 14.0 (57)          |
| Lewerin (8)                           | 202                                                 | 183 (91)                                            | 14 (139)         | 61 (126)         | 16 (70)          | 16 (67)          | 16.7 (139)            | 11.3 (126)        | 15.7 (70)          | 15.8 (67)          |
| McMahon (9)                           | 273                                                 | 248 (91)                                            | 18 (127)         | 75 (124)         | 20 (125)         | 19 (121)         | 15.8 (127)            | 8.7 (127)         | 16.0 (126)         | 13.0 (126)         |
| FACIT (10) <sup>3</sup>               | 818                                                 | 801 (98)                                            | 12 (405)         | 76 (394)         | 12 (413)         | 13 (406)         | 13.0 (405)            | 10.1 (393)        | 12.9 (412)         | 13.4 (406)         |
| <b>Sub-total</b>                      | <b>1423</b>                                         | <b>1340 (94)</b>                                    | <b>13 (671)</b>  | <b>67 (644)</b>  | <b>13 (608)</b>  | <b>14 (594)</b>  | <b>14.0 (734)</b>     | <b>10.0 (697)</b> | <b>13.7 (671)</b>  | <b>13.5 (656)</b>  |
| <b><i>Global cognition trials</i></b> |                                                     |                                                     |                  |                  |                  |                  |                       |                   |                    |                    |
| Stott (11) <sup>2</sup>               | 185                                                 | 167 (90)                                            | -                | -                | -                | -                | 14.8 (92)             | 10.7 (89)         | 15.1 (93)          | 15.7 (86)          |
| HOPE-2 (12)                           | 1327                                                | 1245 (94)                                           | 28 (287)         | 45 (288)         | 29 (290)         | 23 (289)         | 10.7 (568)            | 9.0 (292)         | 10.7 (559)         | 11.9 (294)         |
| SU.FOL.OM3 (13) <sup>2</sup>          | -                                                   | 1309 (-)                                            | 15 (1204)        | 36 (573)         | 16 (606)         | 15 (272)         | 13.0 (1228)           | 11.6 (571)        | 12.6 (614)         | 14.5 (276)         |
| WAFACS (14)                           | 2007                                                | 1756 (87)                                           | 20 (51)          | 93 (51)          | 21 (55)          | 39 (55)          | 12.9 (51)             | 11.1 (51)         | 13.6 (55)          | 13.4 (55)          |
| VISP (15)                             | 3680                                                | 2653 (72)                                           | 23 (1681)        | 63 (1407)        | 23 (1704)        | 23 (1437)        | 12.3 (1800)           | 9.5 (1505)        | 12.3 (1822)        | 11.6 (1546)        |
| VITATOPS (16)                         | -                                                   | 4410 (-)                                            | 21 (118)         | 32 (84)          | 19 (113)         | 20 (81)          | 12.5 (604)            | 9.6 (580)         | 12.8 (601)         | 13.0 (584)         |
| SEARCH (17)                           | -                                                   | 8891 (-)                                            | 14 (4286)        | 52 (686)         | 14 (4331)        | 14 (746)         | 12.3 (4365)           | 9.6 (4150)        | 12.3 (4414)        | 13.4 (4247)        |
| <b>Sub-total</b>                      | <b>7199</b>                                         | <b>20431 (-)</b>                                    | <b>15 (7627)</b> | <b>46 (3089)</b> | <b>16 (7099)</b> | <b>19 (2880)</b> | <b>12.3 (8708)</b>    | <b>9.7 (7238)</b> | <b>12.2 (8158)</b> | <b>13.0 (7088)</b> |

<sup>1</sup> Median red cell folate levels before and after treatment were 528 and 1413 nmol/L, respectively, in those allocated B-vitamins and 566 and 618 nmol/L respectively, in those allocated control.

<sup>2</sup> Refers to group allocated B-vitamins vs placebo.

<sup>3</sup> Published data only.

Folate was measured by immunoassay in all trials except for Lewerin and VISP (which used a radioassay) and McMahon (which used a microbiological assay).



**Supplemental Table 5: Median plasma levels of vitamin B12 before and after study treatment**

| Trial (Reference)                     | No. with cognitive function measured at baseline | No. (%)with cognitive function at end treatment | Vitamin B12 (pmol/L) |                   |                   |                   |
|---------------------------------------|--------------------------------------------------|-------------------------------------------------|----------------------|-------------------|-------------------|-------------------|
|                                       |                                                  |                                                 | B-vitamins           |                   | Placebo           |                   |
|                                       |                                                  |                                                 | Before(N)            | After(N)          | Before(N)         | After(N)          |
| <b><i>Cognitive-domain trials</i></b> |                                                  |                                                 |                      |                   |                   |                   |
| Eussen (7) <sup>1</sup>               | 130                                              | 108 (83)                                        | 196 (62)             | 583 (51)          | 173 (63)          | 175 (55)          |
| Lewerin (8)                           | 202                                              | 183 (91)                                        | 290 (139)            | 532 (125)         | 330 (70)          | 321 (67)          |
| McMahon (9)                           | 273                                              | 248 (91)                                        | 267 (127)            | 543 (124)         | 265 (126)         | 242 (124)         |
| FACIT (10) <sup>2</sup>               | 818                                              | 801 (98)                                        | 290 (405)            | 264 (394)         | 286 (413)         | 273 (406)         |
| <b>Sub-total</b>                      | <b>1423</b>                                      | <b>1340(94)</b>                                 | <b>277 (733)</b>     | <b>362 (694)</b>  | <b>279 (672)</b>  | <b>261 (652)</b>  |
| <b><i>Global cognition trials</i></b> |                                                  |                                                 |                      |                   |                   |                   |
| Stott (11) <sup>1</sup>               | 185                                              | 167 (90)                                        | 336 (92)             | 641 (88)          | 343 (93)          | 365 (81)          |
| HOPE-2 (12)                           | 1327                                             | 1245 (94)                                       | 277 (284)            | 885 (281)         | 263 (286)         | 248 (278)         |
| SU.FOL.OM3 (13) <sup>1</sup>          |                                                  | 1309(-)                                         | 359 (1227)           | 499 (575)         | 376 (612)         | 370 (274)         |
| WAFACS (14)                           | 2007                                             | 1756 (87)                                       | 333 (22)             | -                 | 314 (30)          | -                 |
| VISP (15)                             | 3680                                             | 2653 (72)                                       | 320 (1681)           | 541 (1424)        | 324 (1707)        | 362 (1437)        |
| VITATOPS (16)                         | -                                                | 4410 (-)                                        | 283 (243)            | 327 (214)         | 289 (251)         | 161 (209)         |
| SEARCH (17)                           | -                                                | 8891 (-)                                        | 260 (4287)           | 739 (686)         | 263 (4331)        | 261 (746)         |
| <b>Sub-total</b>                      | <b>7199</b>                                      | <b>20431(-)</b>                                 | <b>289 (7836)</b>    | <b>582 (3268)</b> | <b>287 (7310)</b> | <b>318 (3025)</b> |

<sup>1</sup> Refers to group allocated B-vitamins vs placebo.

<sup>2</sup> Published data only.

**Supplemental Table 6: Effects of B-vitamins on cognitive aging in all available trials (including Ford) after taking account of duration of treatment and percent homocysteine reduction**

| Trial (Reference)                                                          | Equivalent study years at 25% tHcy reduction |              | Global cognitive function Z-score difference (SE) by allocated treatment arm (B-vitamin minus placebo) |                                | Years of cognitive aging equivalent (95% CI) |
|----------------------------------------------------------------------------|----------------------------------------------|--------------|--------------------------------------------------------------------------------------------------------|--------------------------------|----------------------------------------------|
|                                                                            | Study years                                  | Person years | Overall in study                                                                                       | Per year at 25% tHcy reduction |                                              |
| <b>Cognitive-domain trials, assessing change in domain-composite score</b> |                                              |              |                                                                                                        |                                |                                              |
| Eussen (7)                                                                 | 0.64                                         | 29           | -0.167 (0.139)                                                                                         | -0.2606 (0.2179)               | 4.83 (-3.08, 12.73)                          |
| Lewerin (8)                                                                | 0.39                                         | 55           | -0.101 (0.085)                                                                                         | -0.2561 (0.2170)               | 4.74 (-3.14, 12.62)                          |
| McMahon (9)                                                                | 2.84                                         | 553          | -0.170 (0.069)                                                                                         | -0.0599 (0.0245)               | 1.11 (0.22, 2.00)                            |
| Ford (31)                                                                  | 2.66                                         | 598          | 0.055 (0.127)                                                                                          | 0.0206 (0.0478)                | -                                            |
| FACIT (10)                                                                 | 3.13                                         | 2454         | 0.071 (0.034)                                                                                          | 0.0228 (0.0108)                | -0.42 (-0.81, -0.03)                         |
| Subtotal: cognitive (excluding Ford)                                       | -                                            | -            | 0.003 (0.028)                                                                                          | 0.0082 (0.0098)                | -0.15 (-0.51, 0.20)                          |
| <b>Global cognition trials, assessing end of treatment MMSE-type score</b> |                                              |              |                                                                                                        |                                |                                              |
| Stott (11)                                                                 | 1.13                                         | 148          | 0.009 (0.155)                                                                                          | 0.0082 (0.1365)                | -0.23 (-7.66, 7.20)                          |
| Ford (31)                                                                  | 2.66                                         | 598          | -0.105 (0.129)                                                                                         | -0.0396 (0.0485)               | 1.10 (-1.54, 3.74)                           |
| HOPE-2 (12)                                                                | 4.64                                         | 6090         | -0.002 (0.057)                                                                                         | -0.0004 (0.0122)               | 0.01 (-0.65, 0.68)                           |
| WAFACS (14)                                                                | 2.95                                         | 10379        | 0.006 (0.048)                                                                                          | 0.0019 (0.0162)                | -0.05 (-0.93, 0.83)                          |
| SU.FOL.OM3 (13)                                                            | 3.88                                         | 6152         | -0.049 (0.059)                                                                                         | -0.0128 (0.0153)               | 0.35 (-0.48, 1.18)                           |
| VISP (15)                                                                  | 1.30                                         | 5193         | 0.013 (0.039)                                                                                          | 0.0101 (0.0299)                | -0.28 (-1.91, 1.35)                          |
| VITATOPS (16)                                                              | 3.32                                         | 14256        | 0.001 (0.030)                                                                                          | 0.0004 (0.0091)                | -0.01 (-0.51, 0.48)                          |
| SEARCH (17)                                                                | 8.45                                         | 63439        | -0.011 (0.021)                                                                                         | -0.0013 (0.0025)               | 0.04 (-0.10, 0.17)                           |
| Subtotal: other                                                            | -                                            | -            | -0.006 (0.014)                                                                                         | -0.0014 (0.0023)               | 0.04 (-0.09, 0.16)                           |
| <b>All</b>                                                                 | -                                            | -            | -0.004 (0.012)                                                                                         | -0.0009 (0.0023)               | 0.02 (-0.10, 0.14)                           |

The study by Ford was a double-blind randomized controlled trial of 299 men randomized to receive either B-vitamins or placebo for 2 years. This study reported both change from baseline results and end-treatment results for global cognitive function as measured by the MMSE and ADAS-cog. The numbers in this table are based on the MMSE as this was used in other studies. The percent homocysteine reduction observed was 33.2% for those receiving B-vitamins compared to those receiving placebo.

The overall global cognitive function Z-score difference (SE) using the ADAS-cog for the Ford study from the change from baseline analysis was 0.0272 (0.1289) with a per year at 25% tHcy reduction of 0.01023 (0.0485).

The years of cognitive aging equivalent (95% CI) for the Ford study using the end-treatment ADAS-cog was 1.52 (-1.12, 4.16) this gave a years of cognitive aging for all studies combined (95% CI) of -0.02 (-0.10, 0.14).

### Supplemental Figure 1: Screening and selection of included trials

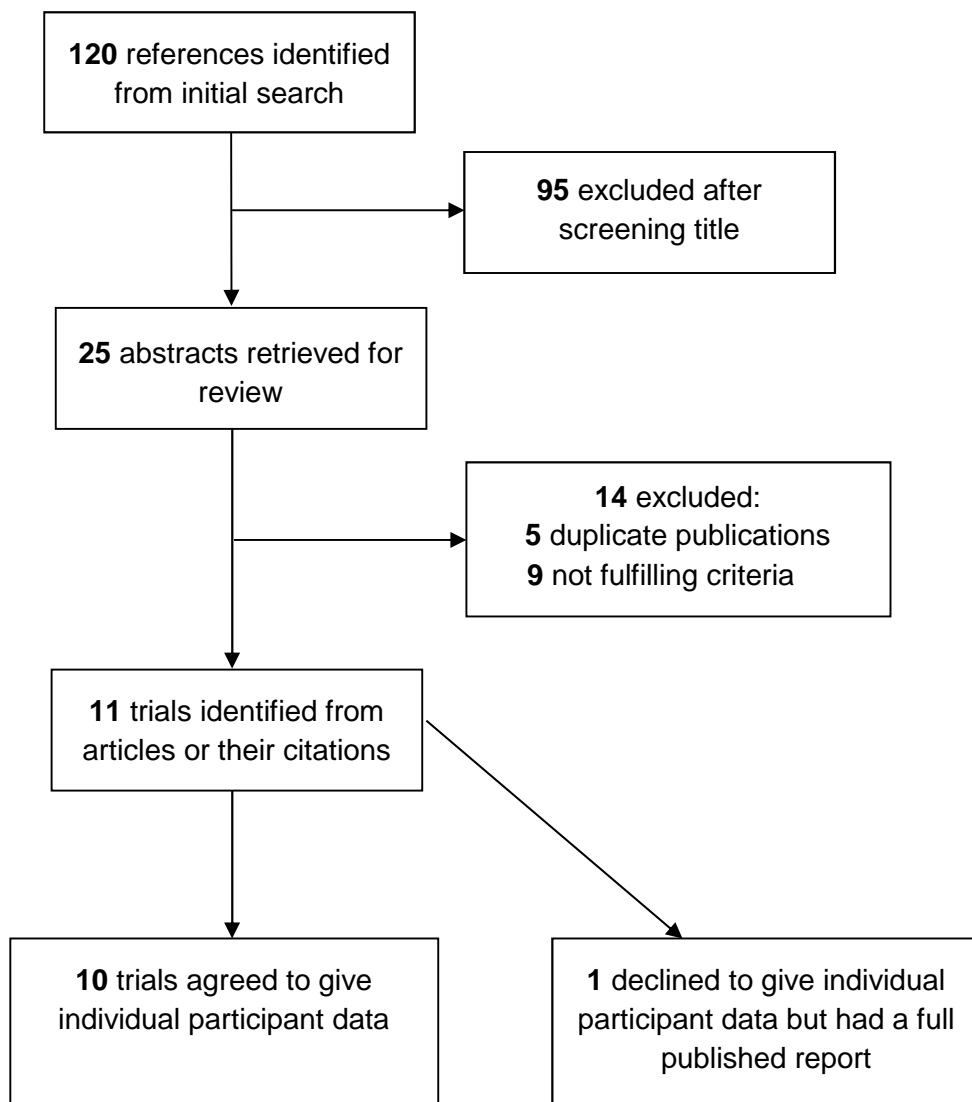

## Supplemental Figure 2: Effects of B-vitamins on the memory and executive function domains of cognitive function assessed using change from baseline <sup>1</sup>

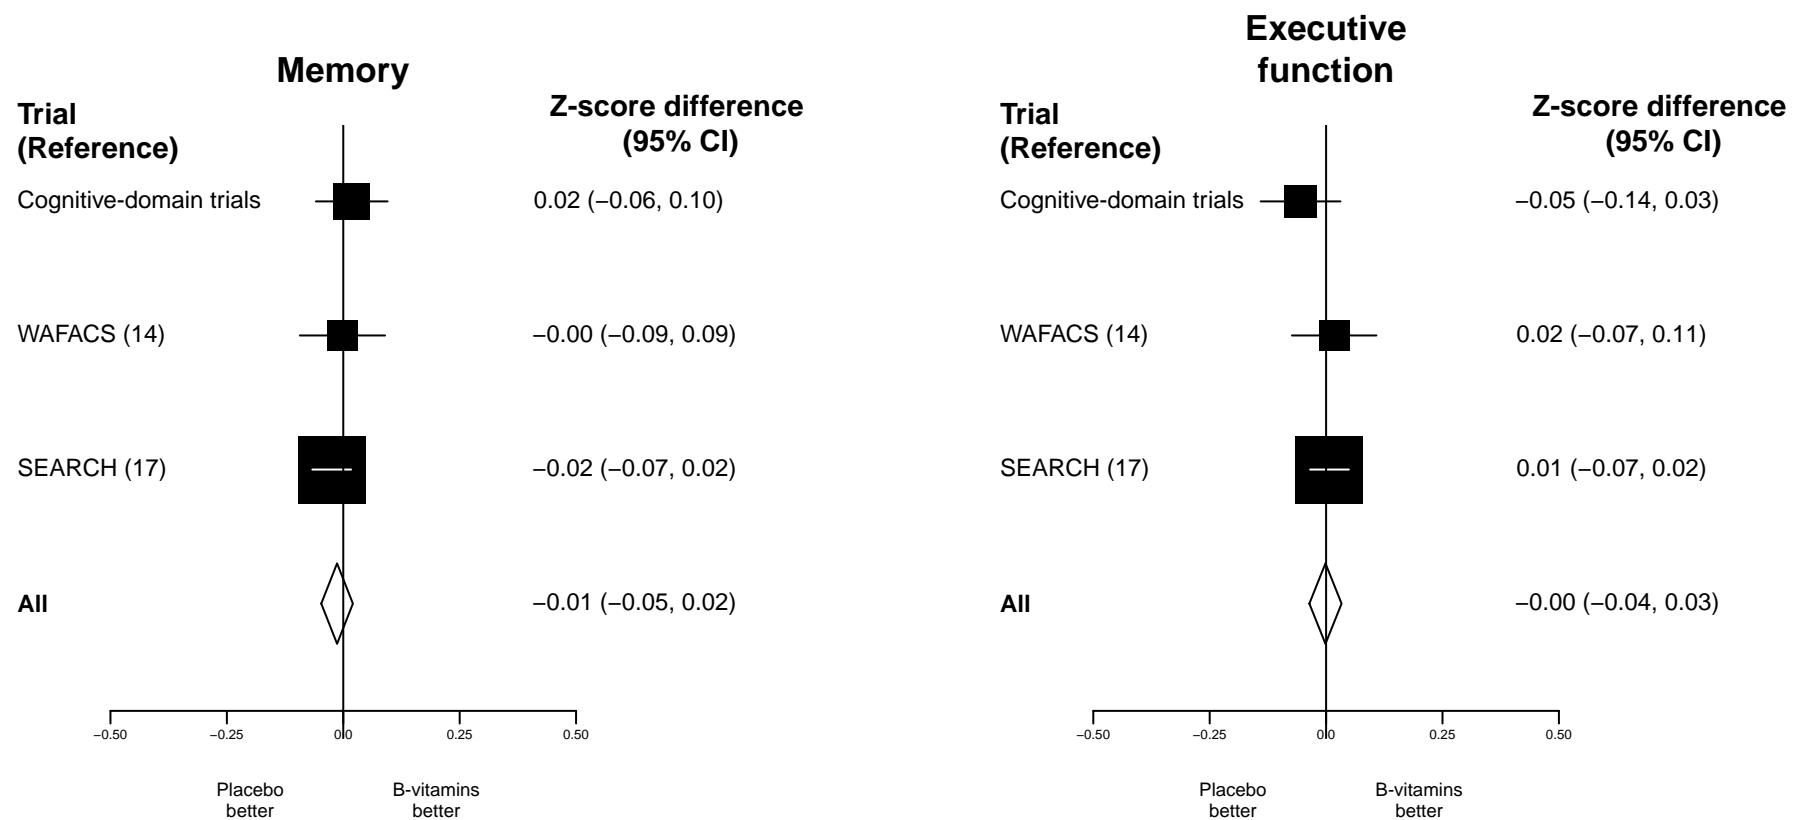

<sup>1</sup> All studies assessed by change from baseline except SEARCH, which was assessed at end of scheduled treatment

### Supplemental Figure 3: Effects of B-vitamins on MMSE-type global cognitive function score in the cognitive-domain trials assessed using change from baseline

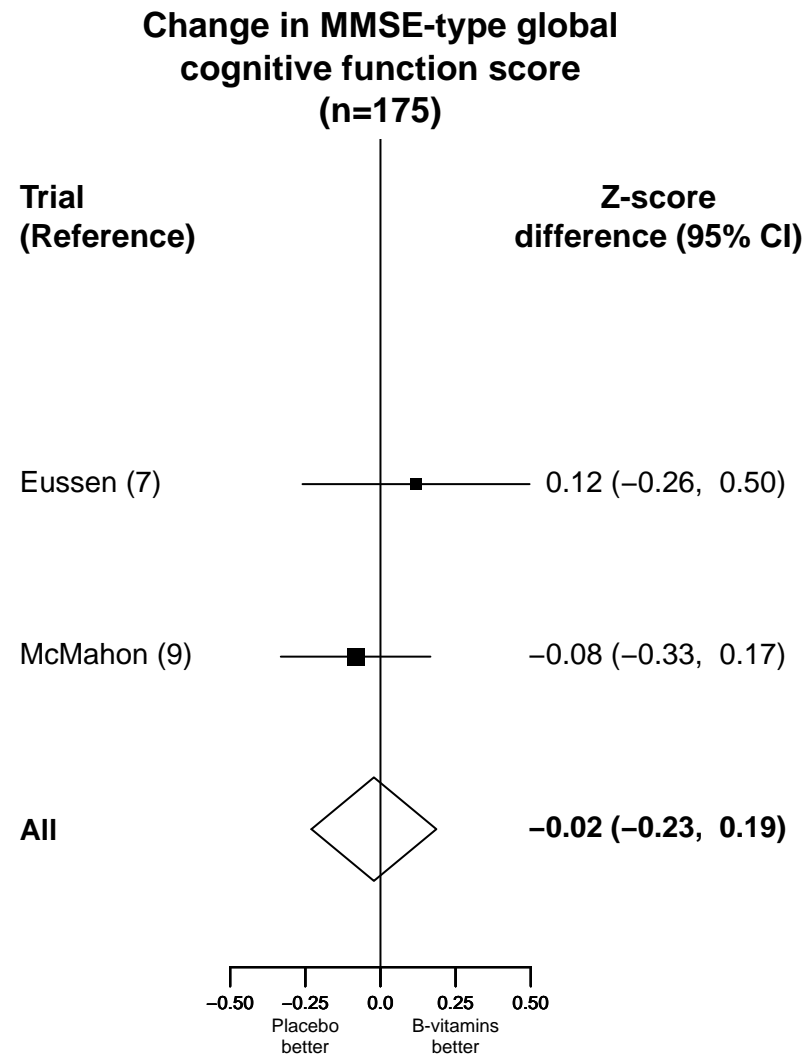

## Supplemental Figure 4: Effects of B-vitamins on MMSE-type global cognitive function score at the end of the treatment period in various subgroups in global cognition trials

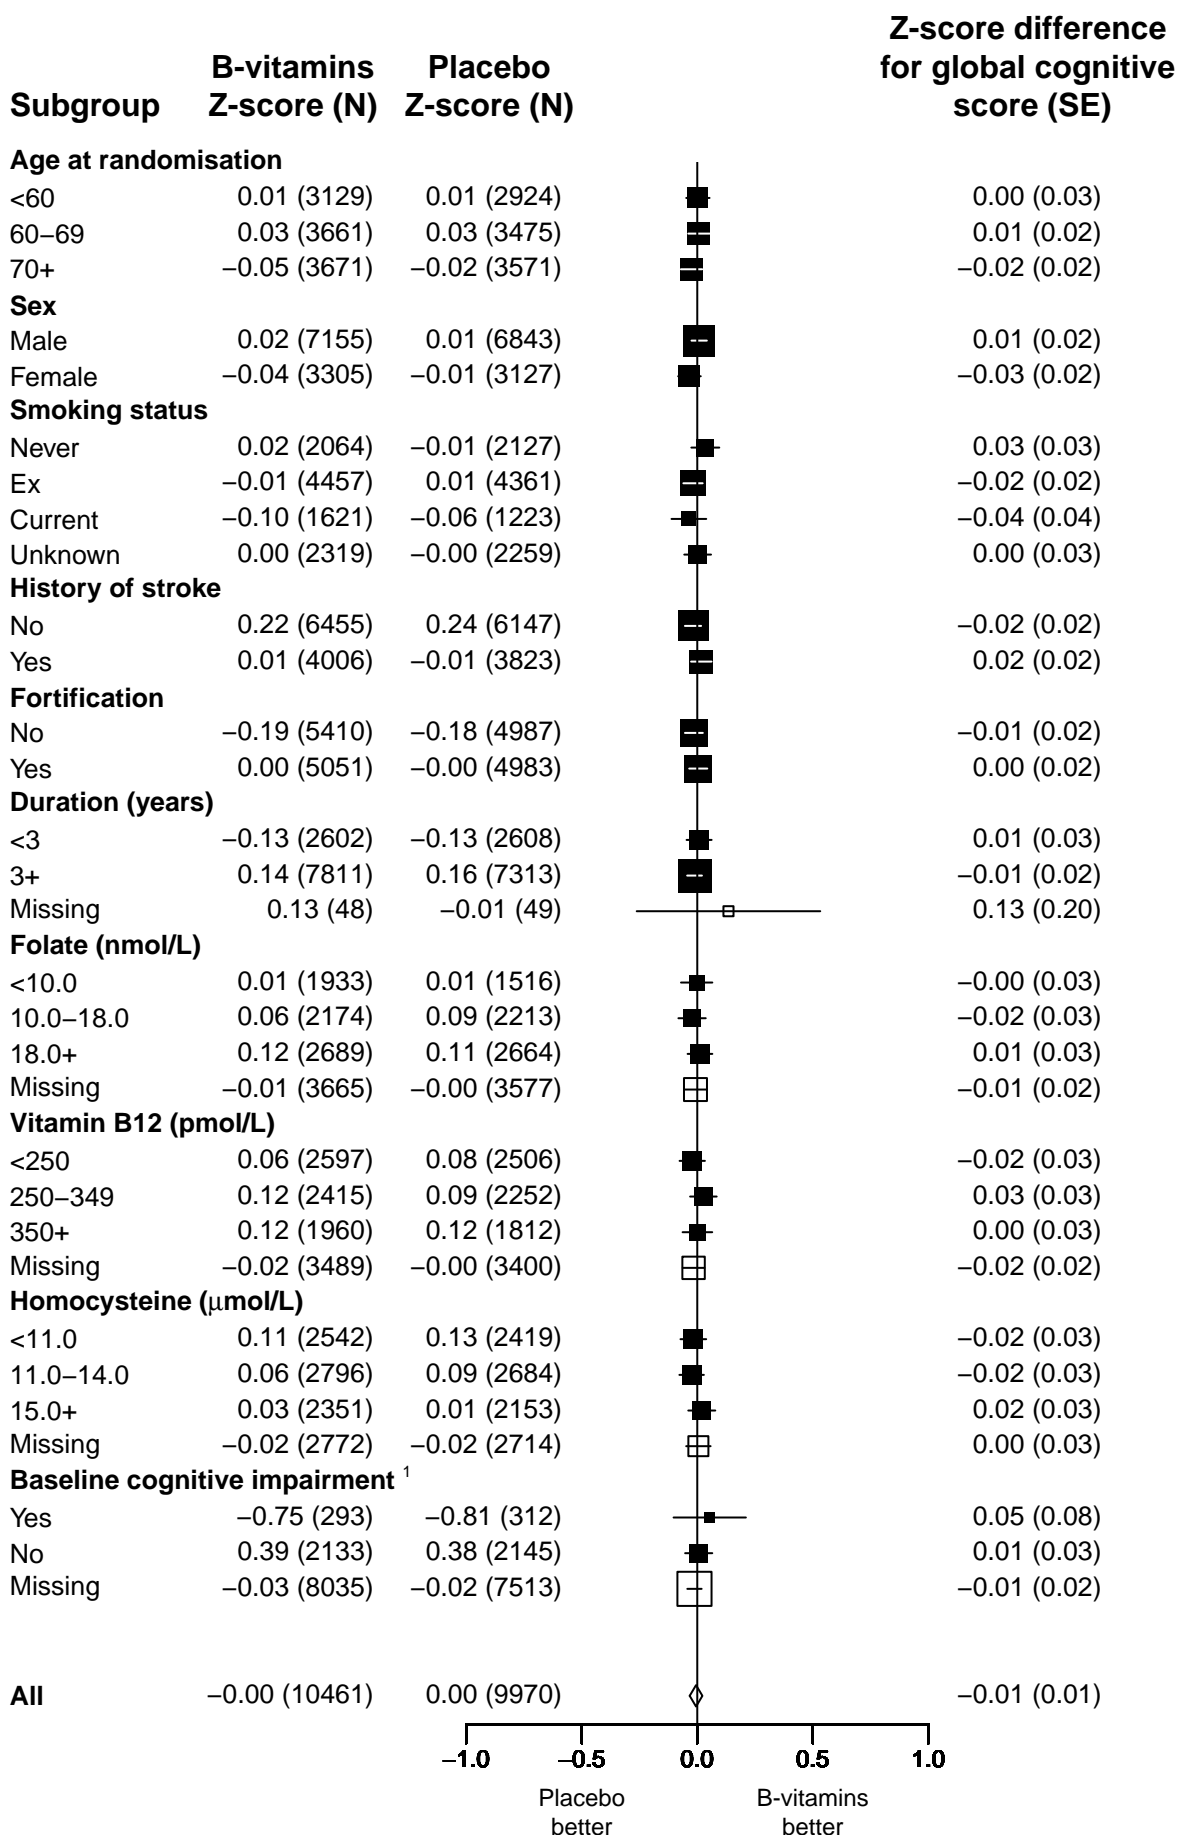

<sup>1</sup>Cognitive impairment defined as MMSE score of < 24, a TICS score of < 31, or a TICS-M score of < 22

**Supplemental Figure 5: Effects of B-vitamins on cognitive aging using MMSE-type global cognitive function score in all available trials after taking account of duration of treatment and percent homocysteine reduction**

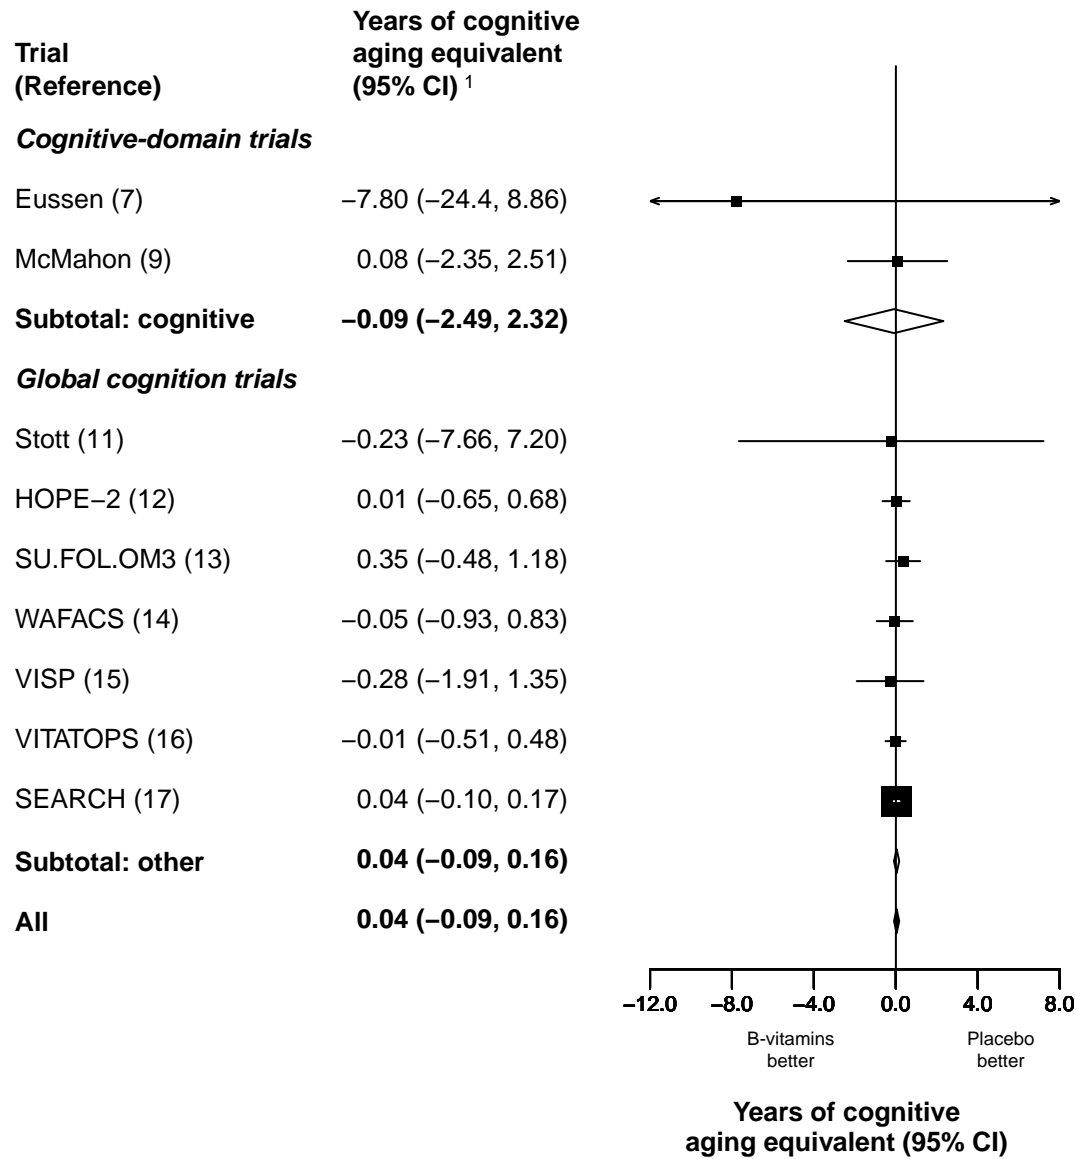

<sup>1</sup> The age association was based on 0.036 per year reduction in MMSE-type cognitive Z-score
